# Supplementary material for: Hydrogen gas generation using a metal-free fluorinated porphyrin
Source: Royal Society of Chemistry journal article supplement (doi:10.1039/c8sc00093j), 2018-01-01
Supplement: c8sc00093j1.pdf [file c8sc00093j1.pdf]

# Hydrogen Gas Generation by a Metal-Free Fluorinated Porphyrin

Yanyu Wu, Nancy Rodríguez López, Dino Villagrán \*

Department of Chemistry, The University of Texas at El Paso, El Paso, TX 79968, United States

## Table of Contents

|                                                                                                                                                                                                                                                                                                |    |
|------------------------------------------------------------------------------------------------------------------------------------------------------------------------------------------------------------------------------------------------------------------------------------------------|----|
| Figure S1. Cyclic voltammogram of <i>p</i> -toluenesulfonic acid in THF (no catalyst added); Scan rate: 100 mV/s; glassy carbon working electrode.....                                                                                                                                         | 2  |
| Figure S2. Cyclic voltammogram of <i>p</i> -toluenesulfonic acid in THF (no catalyst added); Scan rate: 100 mV/s; gold working electrode.....                                                                                                                                                  | 2  |
| Figure S3. Cyclic voltammograms of <i>meso</i> -tetraphenylporphyrin with 0.1 M TBAPF <sub>6</sub> in THF and titrating with <i>tosic</i> acid: 100 mV/s; glassy carbon working electrode.....                                                                                                 | 3  |
| Figure S4. UV-vis spectra of <i>meso</i> -tetraphenylporphyrin (black line) and <i>meso</i> -tetraphenylporphyrin with addition of <i>tosic</i> acid (colored lines).....                                                                                                                      | 3  |
| Figure S5. Plot of current density versus time of controlled -potential electrolysis experiment containing 1 mM of <b>1</b> , 0.1M TBAPF <sub>6</sub> and 10 mM <i>tosic</i> acid on a carbon rod electrode at -1.7 V vs Fc/Fc <sup>+</sup> .....                                              | 4  |
| Figure S6. Cyclic voltammograms recorded using the rinsed glassy carbon electrode after performing bulk electrolysis in the presence of 0.1 mM <b>1</b> at -1.7 V vs. Fc/Fc <sup>+</sup> for an hour. Scan rate: 100 mV/s; glassy carbon working electrode.....                                | 4  |
| Figure S7. Cyclic voltammograms recorded using the rinsed glassy carbon electrode after performing bulk electrolysis in the presence of 0.1 mM <b>1</b> and 10 equiv <i>tosic</i> acid at -1.7 V vs. Fc/Fc <sup>+</sup> for an hour. Scan rate: 100 mV/s; glassy carbon working electrode..... | 5  |
| Calculation of overpotential.....                                                                                                                                                                                                                                                              | 6  |
| Table S2. Hammett constants for substituents.....                                                                                                                                                                                                                                              | 6  |
| Calculation of $k_{obs}$ from foot-of-the-wave analysis (FOWA).....                                                                                                                                                                                                                            | 7  |
| Figure S8. FOWA linear fit of <b>1</b> for hydrogen generation.....                                                                                                                                                                                                                            | 9  |
| Table S3. Summary of $m$ , and $k_{obs}$ at different acid concentration.....                                                                                                                                                                                                                  | 9  |
| Figure S9. Plot of observed rate constant versus acid concentration. ( $R^2=0.9967$ ).....                                                                                                                                                                                                     | 10 |
| Figure S10. Linear sweep voltammograms of 0.1 mM <b>1</b> (black) and <b>1</b> with 12 equivalent deuterated <i>tosic</i> acid (red).....                                                                                                                                                      | 10 |
| Figure S11. FOWA linear fit of <b>1</b> for hydrogen generation using 1.2 mM deuterated <i>tosic</i> acid.....                                                                                                                                                                                 | 11 |

|                                                                                                                                                             |    |
|-------------------------------------------------------------------------------------------------------------------------------------------------------------|----|
| Figure S12. Change of absorption of 1 at 408 nm over time during electrolysis containing 1 M TBAPF <sub>6</sub> in THF.....                                 | 12 |
| Figure S13. Uv-vis spectrum of [1] <sup>2-</sup> (black) and the spectrum recorded upon addition of <i>tosic</i> acid to [1] <sup>2-</sup> (red).....       | 13 |
| Table S4. Experimental <sup>5</sup> and calculated pK <sub>a</sub> 's for acetic acid, benzoic acid, <i>tosic</i> acid and phenol in acetonitrile.....      | 14 |
| Table S5. Calculated redox potentials and pK <sub>a</sub> 's in THF, values in parentheses correspond to the experimental values obtained in this work..... | 14 |
| Table S6. Metal-free porphyrin core bond lengths and distances.....                                                                                         | 14 |
| Cartesian coordinates of the DFT optimized structure [1] in the gas phase.....                                                                              | 15 |
| Cartesian coordinates of the DFT optimized structure [1] <sup>-</sup> in the gas phase.....                                                                 | 16 |
| Cartesian coordinates of the DFT optimized structure [1] <sup>2-</sup> in the gas phase.....                                                                | 17 |
| Cartesian coordinates of the DFT optimized structure [1-H] in the gas phase.....                                                                            | 18 |
| Cartesian coordinates of the DFT optimized structure [1-H] <sup>-</sup> in the gas phase.....                                                               | 19 |
| Cartesian coordinates of the DFT optimized structure [1-HH] in the gas phase.....                                                                           | 20 |
| Cartesian coordinates of the DFT optimized structure [1-HH] <sup>+</sup> in the gas phase.....                                                              | 21 |
| Cartesian coordinates of the DFT optimized structure [1-HH] <sup>2+</sup> in the gas phase.....                                                             | 22 |
| Cartesian coordinates of the DFT optimized structure of <i>p</i> -toluenesulfonic acid (TsOH) in the gas phase.....                                         | 23 |
| Cartesian coordinates of the DFT optimized structure of tosylate (TsO <sup>-</sup> ) in the gas phase.....                                                  | 24 |
| Cartesian coordinates of the DFT optimized structure of acetic acid (AcOH) in the gas phase.....                                                            | 25 |
| Cartesian coordinates of the DFT optimized structure of acetate (AcO <sup>-</sup> ) in the gas phase.....                                                   | 26 |
| Cartesian coordinates of the solvated DFT optimized structure [1] in THF.....                                                                               | 27 |
| Cartesian coordinates of the solvated DFT optimized structure [1] <sup>-</sup> in THF.....                                                                  | 28 |
| Cartesian coordinates of the solvated DFT optimized structure [1] <sup>2-</sup> in THF.....                                                                 | 29 |
| Cartesian coordinates of the solvated DFT optimized structure [1-H] in THF.....                                                                             | 30 |
| Cartesian coordinates of the solvated DFT optimized structure [1-H] <sup>-</sup> in THF.....                                                                | 31 |
| Cartesian coordinates of the solvated DFT optimized structure [1-HH] in THF.....                                                                            | 32 |
| Cartesian coordinates of the solvated DFT optimized structure [1-HH] <sup>+</sup> in THF.....                                                               | 33 |
| Cartesian coordinates of the solvated DFT optimized structure [1-HH] <sup>2+</sup> in THF.....                                                              | 34 |
| Cartesian coordinates of the solvated DFT optimized structure of <i>p</i> -toluenesulfonic acid (TsOH) in THF.....                                          | 35 |
| Cartesian coordinates of the solvated DFT optimized structure of tosylate (TsO <sup>-</sup> ) in THF.....                                                   | 36 |
| Cartesian coordinates of the DFT optimized structure of acetic acid (AcOH) in THF.....                                                                      | 37 |
| Cartesian coordinates of the DFT optimized structure of acetate (AcO <sup>-</sup> ) in THF.....                                                             | 38 |
| References.....                                                                                                                                             | 39 |

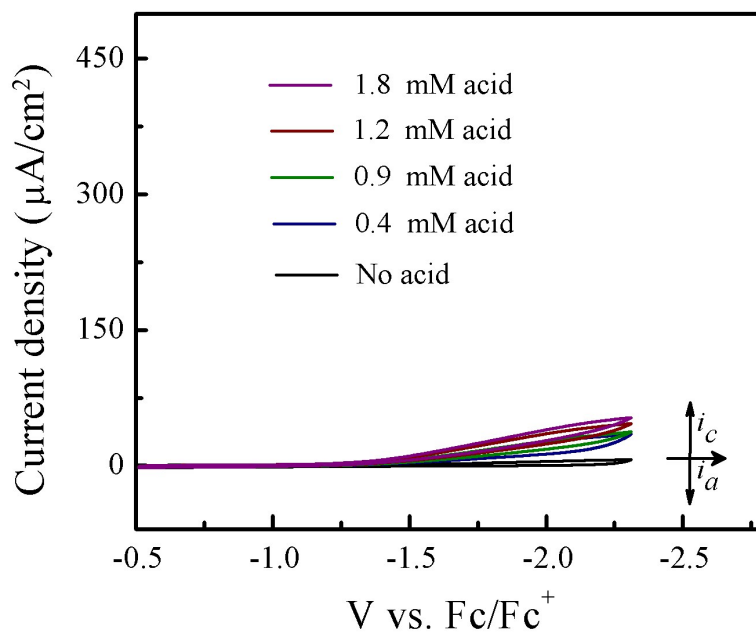

**Figure S1.** Cyclic voltammogram of *p*-toluenesulfonic acid in THF (no catalyst added); Scan rate: 100 mV/s; glassy carbon working electrode.

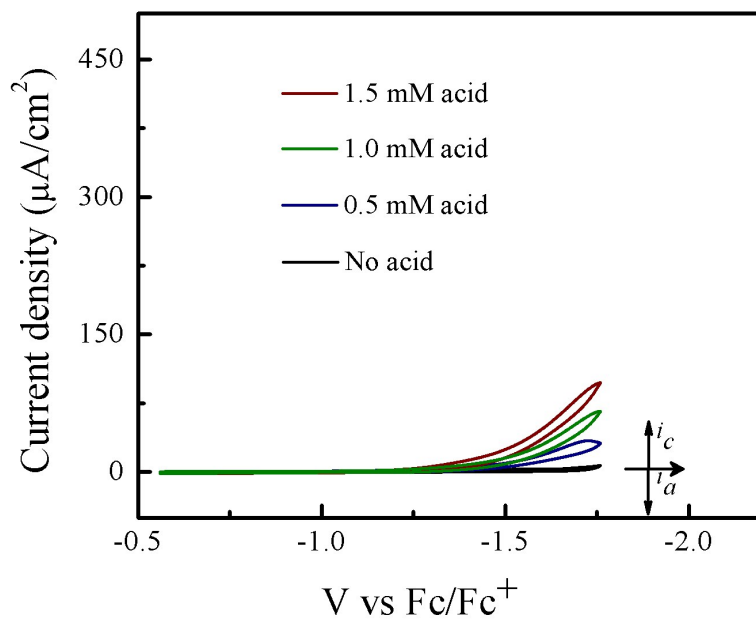

**Figure S2.** Cyclic voltammogram of *p*-toluenesulfonic acid in THF (no catalyst added); Scan rate: 100 mV/s; gold working electrode.

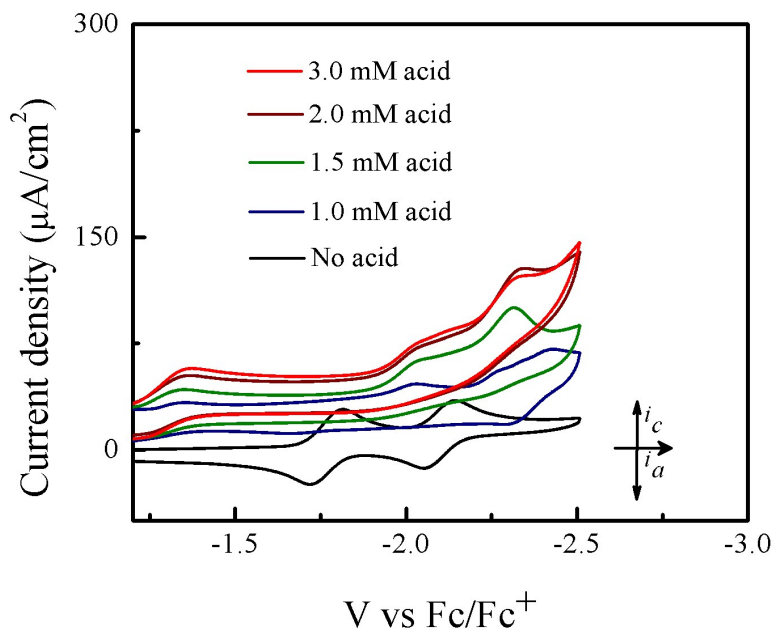

**Figure S3.** Cyclic voltammograms of *meso*-tetraphenylporphyrin with 0.1 M TBAPF<sub>6</sub> in THF and titrating with *tosic* acid: 100 mV/s; glassy carbon working electrode.

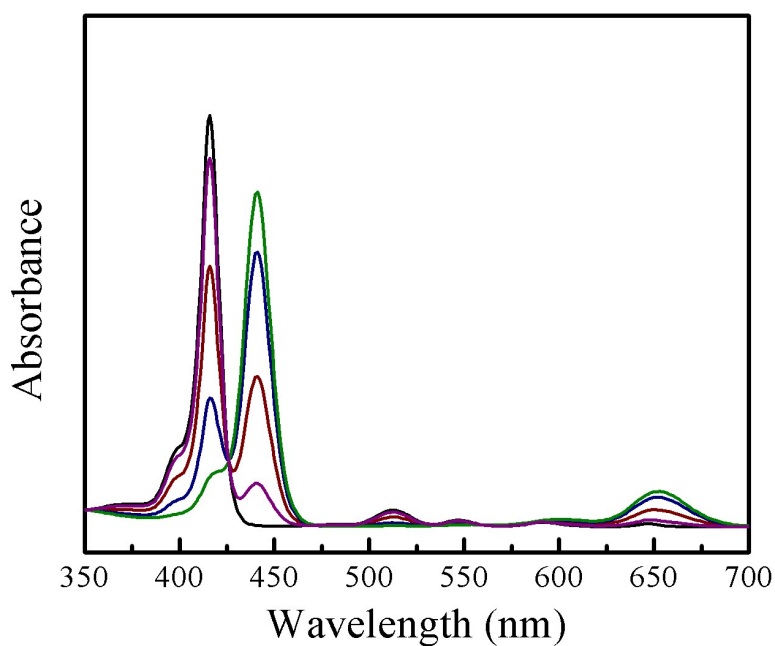

**Figure S4.** UV-vis spectra of *meso*-tetraphenylporphyrin (black line) and *meso*-tetraphenylporphyrin with addition of *tosic* acid (colored lines). This indicates that the free-base porphyrin is doubly protonated by *tosic* acid.

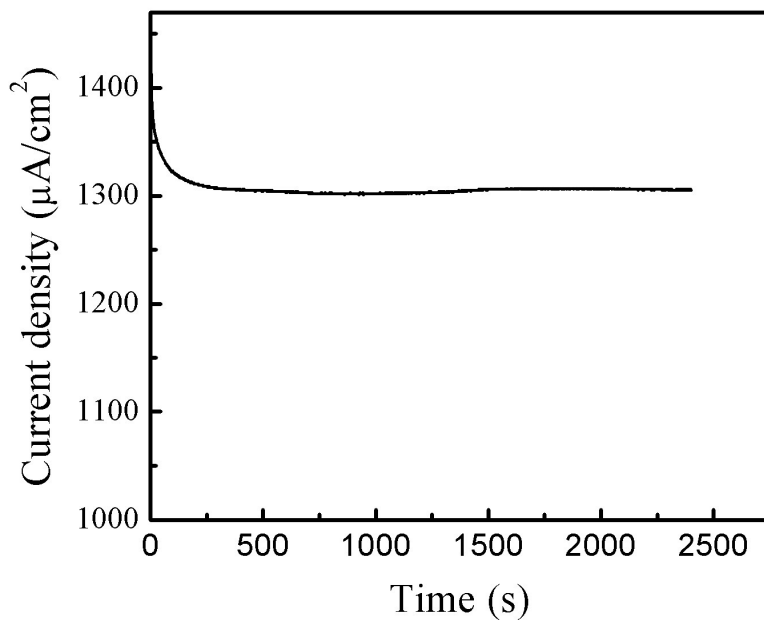

**Figure S5.** Plot of current density versus time of controlled-potential electrolysis experiment containing 50 mL THF solution of 1 mM of **1**, 0.1M TBAPF<sub>6</sub> and 10 mM *tosic* acid on a carbon rod electrode at  $-1.7$  V vs Fc/Fc<sup>+</sup>.

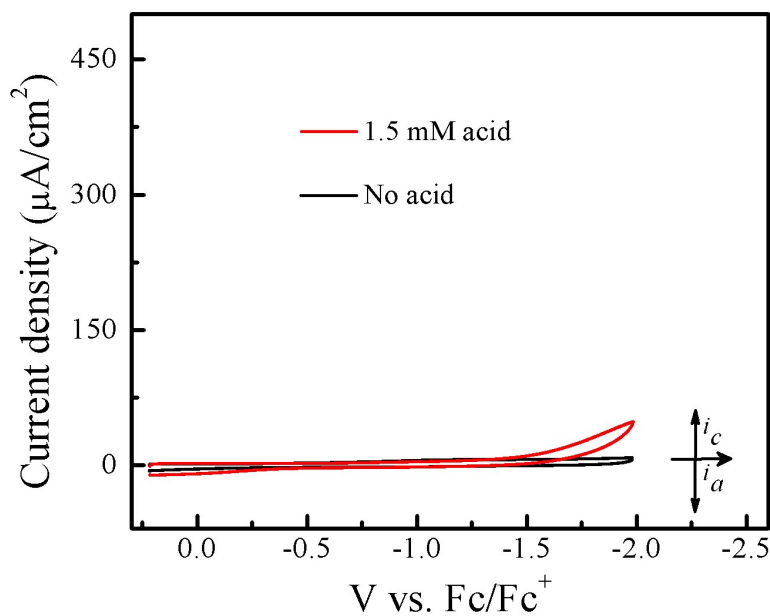

**Figure S6.** Cyclic voltammograms recorded using the rinsed glassy carbon electrode after performing bulk electrolysis in the presence of 0.1 mM **1** at  $-1.7$  V vs. Fc/Fc<sup>+</sup> for an hour. Scan rate: 100 mV/s; glassy carbon working electrode.

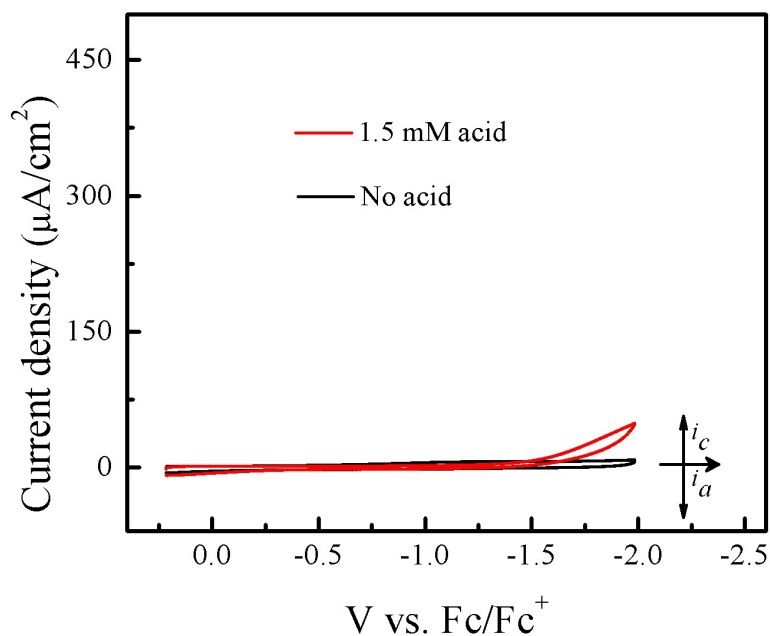

**Figure S7.** Cyclic voltammograms recorded using the rinsed glassy carbon electrode after performing bulk electrolysis in the presence of 0.1 mM **1** and 10 equiv *tosic* acid at  $-1.7$  V vs.  $\text{Fc}/\text{Fc}^+$  for an hour. Scan rate: 100 mV/s; glassy carbon working electrode.

**Table S1.** Charge passed, Volumes of  $\text{H}_2$  measured and corresponding Faradaic efficiencies.

| Catalyst | Solvent | Potential/V<br>vs $\text{Fc}/\text{Fc}^+$ | Time/min | q/C  | $V_{\text{H}_2}/\text{mmol}$ | f/% |
|----------|---------|-------------------------------------------|----------|------|------------------------------|-----|
| <b>1</b> | THF     | -1.7                                      | 40       | 3.18 | 0.0149                       | 90  |
| None     | THF     | -1.7                                      | 40       | 0.32 | 0                            | 0   |

### Calculation of overpotential.

Overpotential is calculated through  $|E_{H^+} - E_{cat/2}|$ , where  $E_{H^+}$  is the equilibrium potential of  $H^+/H_2$  of *tosic* acid in THF and  $E_{cat/2}$  is the potential at  $i_{cat/2}$ .  $E_{H^+}$  is equal to the open circuit potential of *tosic* acid in THF solution using a platinum electrode at 1 atm hydrogen gas atmosphere.<sup>1</sup>

**Table S2.** Hammett constants for substituents.<sup>2</sup>

| <i>Substituent</i>            | $\sigma_m$ | $\sigma_p$ |
|-------------------------------|------------|------------|
| C <sub>6</sub> F <sub>5</sub> | 0.26       | 0.27       |
| Cl                            | 0.37       | 0.23       |
| F                             | 0.34       | 0.06       |

### Calculation of $k_{obs}$ from foot-of-the-wave analysis (FOWA).

Foot-of-the-wave analysis (FOWA) was used to determine the observed rate constant ( $k_{obs}$ ) of hydrogen generation of **1**. For an ECEC mechanistic process: <sup>3</sup>

$$i = \frac{2FAC_p^0 \sqrt{Dk_{obs}}}{1 + e^{\left[\frac{F}{RT}(E - E_{cat}/2)\right]}} \quad \text{Eq. S1}$$

Where  $i$  is the catalytic current density (A/cm<sup>2</sup>), F is the Faraday constant (96485 C/mol), A is the surface area of the working electrode (cm<sup>2</sup>),  $C_p^0$  is the concentration of the catalyst (mol/L), T is the temperature (298 K), D is the diffusion coefficient (cm<sup>2</sup>/s) and  $k_{obs}$  is the observed rate constant, according to the Randles-Sevcik equation, the peak current  $i_p$  of a reversible catalytic wave can be described as: <sup>4</sup>

$$i_p = 0.4463 FAC_p^0 \sqrt{\frac{FvD}{RT}} \quad \text{Eq. S2}$$

From Eq. S1 and Eq. S2, we can obtain:<sup>3</sup>

$$\frac{i}{i_p} = \frac{2 \sqrt{\frac{RT}{Fv}} \sqrt{k_{obs}}}{0.4463} * \frac{1}{1 + e^{\left[\frac{F}{RT}(E - E_{cat}/2)\right]}} \quad \text{Eq. S3}$$

Then  $\frac{i}{i_p}$  is plotted versus  $\frac{1}{1 + e^{\left[\frac{F}{RT}(E - E_{cat}/2)\right]}}$  and the linear portion was selected to yield a line with a slope of  $m$ , which can be represented by:



$$m = \frac{2 \sqrt{\frac{RT}{Fv}} \sqrt{k_{obs}}}{0.4463} \quad \text{Eq. S4}$$

Thus  $k_{obs}$  can be calculated through:

$$k_{obs} = \frac{(m)^2 (0.4463)^2 Fv}{4RT} \quad \text{Eq. S5}$$

The catalytic rate constant ( $k_{cat}$ ) is expressed as:

$$k_{cat} = \frac{k_{obs}}{[H^+]} \quad \text{Eq. S6}$$

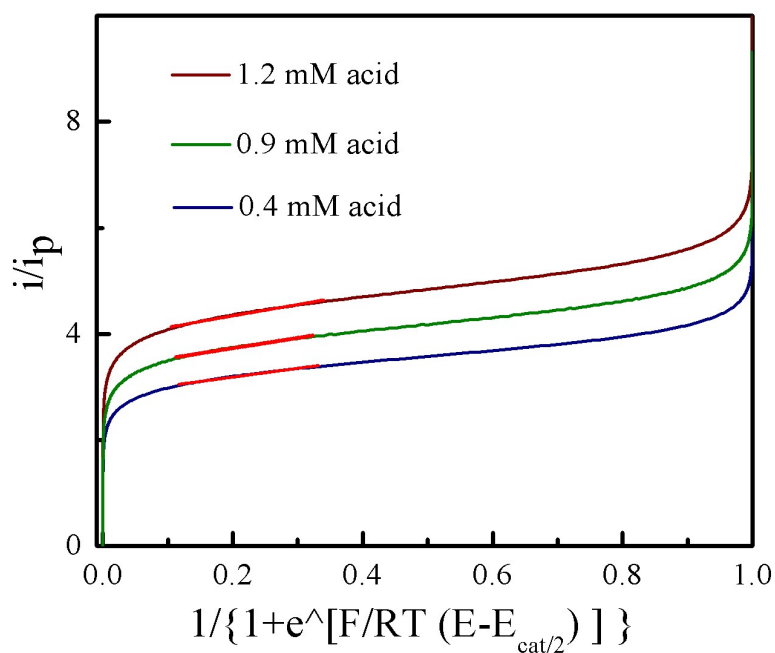

**Figure S8.** FOWA linear fit of **1** for hydrogen generation: 1.2 mM acid: slope= 2.144,  $R^2=$  0.9874; 0.9 mM acid: slope= 1.956,  $R^2=$  0.9876; 0.4 mM acid: 1.651,  $R^2=$  0.9901.

**Table S3.** Summary of  $m$ , and  $k_{obs}$  at different acid concentration.

| $[H^+]$ (mM) | $m$   | $k_{obs}$ ( $s^{-1}$ ) |
|--------------|-------|------------------------|
| 0.4          | 1.651 | 0.528                  |
| 0.9          | 1.956 | 0.742                  |
| 1.2          | 2.144 | 0.891                  |

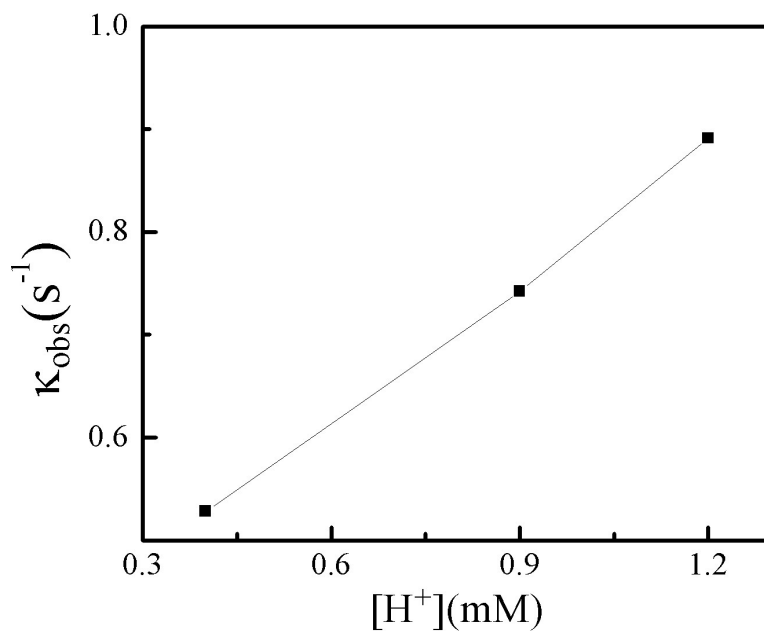

**Figure S9.** Plot of observed rate constant versus acid concentration. ( $R^2=0.9967$ )

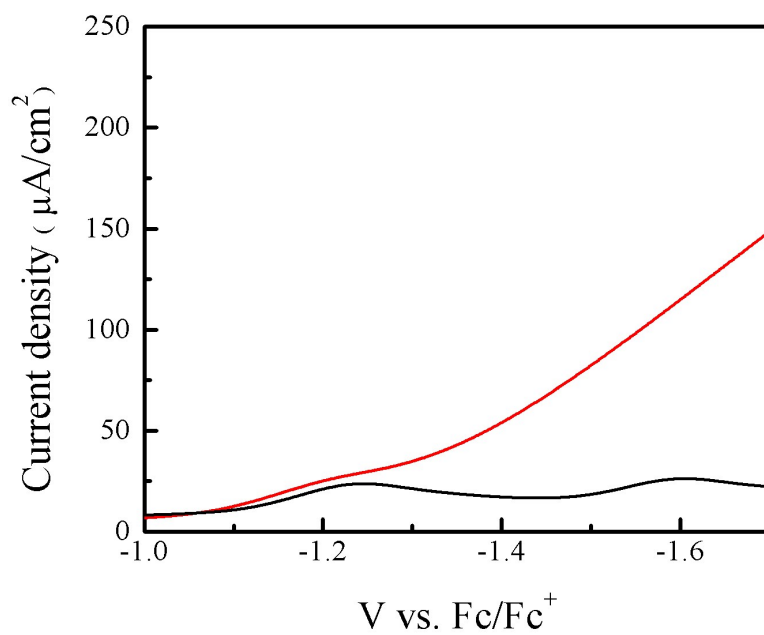

**Figure S10.** Linear sweep voltammograms of 0.1 mM **1** (black) and **1** with 12 equivalent deuterated *tosic* acid (red).

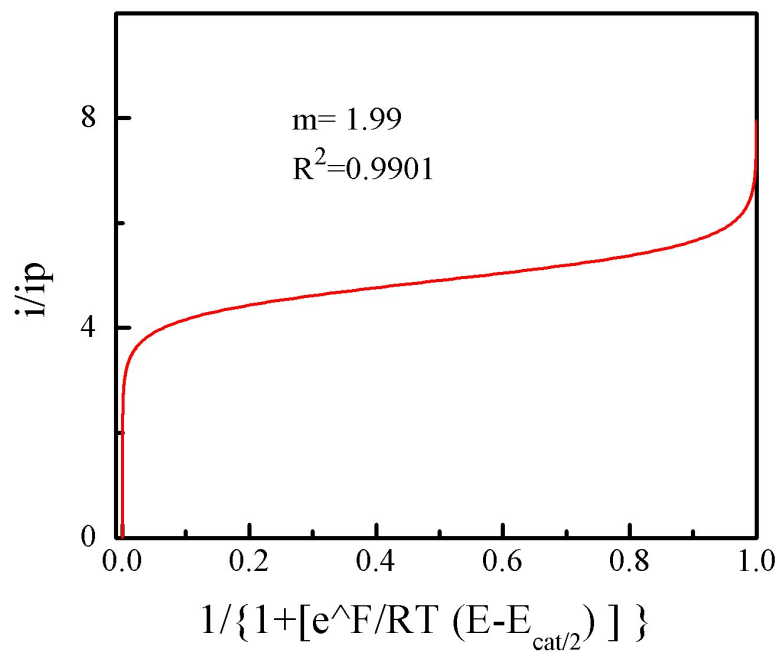

**Figure S11.** FOWA linear fit of 1 for hydrogen generation using 1.2 mM deuterated *tosic* acid.

Kinetic isotope effect (KIE) was analyzed using deuterated *tosic* acid ( $C_7H_7SO_3D$ ). The calculated  $k_{cat}$  using  $C_7H_7SO_3H$  is  $742.5 M^{-1}s^{-1}$  while  $k_{cat}$  using  $C_7H_7SO_3D$  is  $640.0 M^{-1}s^{-1}$ , resulting in  $KIE = k_{cat, C_7H_7SO_3H} / k_{cat, C_7H_7SO_3D} = 1.16$ .<sup>5</sup>

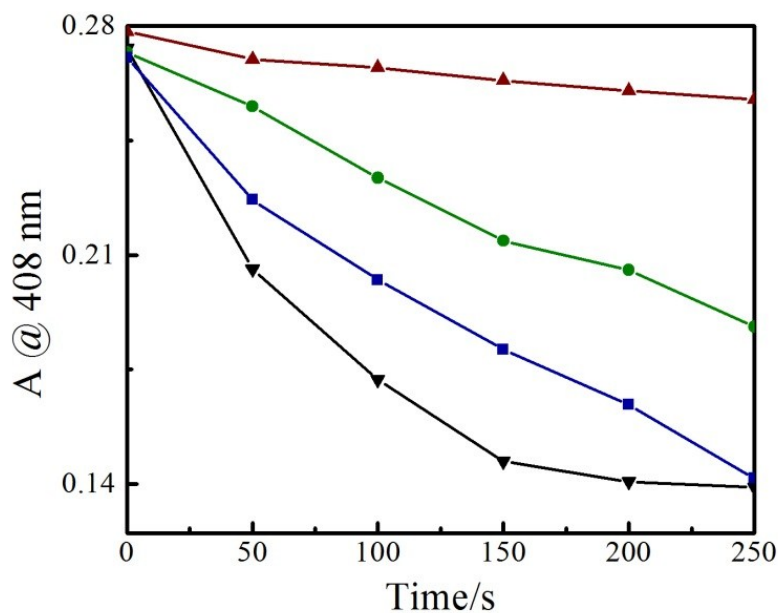

**Figure S12.** Change of absorption of **1** at 408 nm over time during electrolysis containing 1 M TBAPF<sub>6</sub> in THF. (From bottom to top) (▼) -1.7 V without acid; (■) -1.35V without acid; (●) -1.35 V with *p*-toluenesulfonic acid); (▲) -1.7 V with *p*-toluenesulfonic acid (Potentials referred to Fc/Fc<sup>+</sup>).

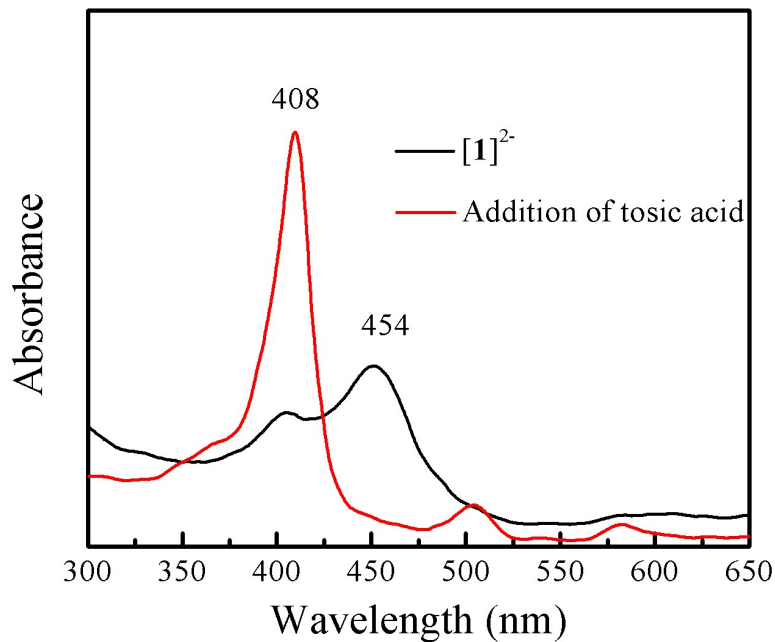

**Figure S13.** Uv-vis spectrum of  $[1]^{2-}$  (black) and the spectrum recorded upon addition of *tosic* acid to  $[1]^{2-}$  (red).

Uv-vis spectroelectrochemical study was performed using **1** at a potential of  $-1.7$  V vs.  $\text{Fc}/\text{Fc}^+$  to obtain the dianion species,  $[1]^{2-}$  (black line in Figure S10). Subsequently, *tosic* acid was added to the solution and **1** was spontaneously obtained according to the spectrum (red line in Figure S10). This implies catalysis occurred upon addition of acid and **1** was regenerated. It should be noted that *E-E-P-P* pathway is also feasible for the generation of hydrogen gas.

**Table S4.** Experimental<sup>6</sup> and calculated  $pK_a$ 's for acetic acid, benzoic acid, *tosic* acid and phenol in acetonitrile.

| <i>Compound</i> | $pK_a^{Exp}$ | $pK_a^{Calc}$ |
|-----------------|--------------|---------------|
| Acetic acid     | 23.51        | 20.76         |
| Benzoic acid    | 21.51        | 19.93         |
| Tosic acid      | 8.45         | 8.74          |
| Phenol          | 29.14        | 27.47         |

**Table S5.** Calculated redox potentials and  $pK_a$ 's in THF, values in parentheses correspond to the experimental values obtained in this work.

| <i>Reaction</i>                                                     | <i>B3LYP</i>                      | <i>B3P86</i> | <i>B3LYP</i> | <i>B3P86</i> |
|---------------------------------------------------------------------|-----------------------------------|--------------|--------------|--------------|
|                                                                     | $E^\circ (V \text{ vs } Fc/Fc^+)$ |              | $pK_a$       |              |
| TsOH + AcO <sup>-</sup> → TsO <sup>-</sup> + AcOH                   |                                   |              | 11.8         | 10.8         |
| [1] + e <sup>-</sup> → [1] <sup>·-</sup>                            | -1.10 (-1.14) <sup>a</sup>        | -0.95        |              |              |
| [1] <sup>·-</sup> + e <sup>-</sup> → [1] <sup>2-</sup>              | -2.12 (-1.54) <sup>a</sup>        | -1.99        |              |              |
| [1-H] <sup>-</sup> + AcO <sup>-</sup> → [1] <sup>2-</sup> + AcOH    |                                   |              | 37.7         | 35.3         |
| [1-HH] + AcO <sup>-</sup> → [1-H] <sup>-</sup> + AcOH               |                                   |              | 22.1         | 21.6         |
| [1-H] <sup>+</sup> + AcO <sup>-</sup> → [1] + AcOH                  |                                   |              | 5.9          | 3.5          |
| [1-HH] <sup>2+</sup> + AcO <sup>-</sup> → [1-H] <sup>+</sup> + AcOH |                                   |              | -9.5         | -11.1        |
| [1-H] <sup>+</sup> + e <sup>-</sup> → [1-H]                         | -0.25                             | -0.08        |              |              |
| [1-HH] <sup>2+</sup> + e <sup>-</sup> → [1-HH] <sup>+</sup>         | 0.69                              | 0.85         |              |              |
| [1-HH] <sup>+</sup> + e <sup>-</sup> → [1-HH]                       | -0.16                             | 0.02         |              |              |
| [1-H] + e <sup>-</sup> → [1-H] <sup>-</sup>                         | -1.09                             | -0.99        |              |              |
| [1-H] + AcO <sup>-</sup> → [1] <sup>-</sup> + AcOH                  |                                   |              | 20.3         | 18.3         |
| [1-HH] <sup>+</sup> + AcO <sup>-</sup> → [1-H] + AcOH               |                                   |              | 6.3          | 4.6          |

<sup>a</sup>Experimental value

**Table S6.** Metal-free porphyrin core bond lengths and distances.<sup>7</sup>

|             | <i>Distance (Å)</i> |
|-------------|---------------------|
| N(2)-H      | 0.80(7)             |
| H...H       | 2.6(1)              |
| N(2)...N(2) | 4.144(3)            |
| N(1)...N(1) | 4.069(3)            |
| N(1)...N(2) | 2.911(3)            |
| N(1)...H    | 2.37(6)             |

### Cartesian coordinates of the DFT optimized structure [1] in the gas phase

|    |             |             |             |
|----|-------------|-------------|-------------|
| C  | -1.13619700 | -2.90862300 | -0.00003100 |
| C  | -0.68764800 | -4.27446000 | -0.00009500 |
| C  | 0.68806400  | -4.27439300 | -0.00009400 |
| C  | 1.13648100  | -2.90851300 | -0.00007700 |
| N  | 0.00010300  | -2.11362300 | -0.00010300 |
| C  | -2.44483100 | -2.42335300 | 0.00002600  |
| C  | 2.44506800  | -2.42311800 | -0.00004800 |
| C  | 2.89692700  | -1.10017600 | 0.00009500  |
| C  | 4.29711900  | -0.68020700 | 0.00022600  |
| C  | 4.29701700  | 0.68070800  | 0.00016700  |
| C  | 2.89688100  | 1.10049500  | 0.00006900  |
| N  | 2.05569100  | 0.00011900  | 0.00028500  |
| C  | 2.44476800  | 2.42353600  | 0.00000900  |
| C  | 1.13625400  | 2.90873400  | -0.00010600 |
| C  | 0.68762700  | 4.27453100  | -0.00020200 |
| C  | -0.68804300 | 4.27446500  | -0.00019100 |
| C  | -1.13653800 | 2.90862400  | -0.00014100 |
| N  | -0.00010300 | 2.11362500  | -0.00032000 |
| C  | -2.44500500 | 2.42330100  | -0.00005600 |
| C  | -2.89698900 | 1.10021400  | 0.00002000  |
| C  | -4.29708500 | 0.68028900  | 0.00010500  |
| C  | -4.29705200 | -0.68062500 | 0.00020600  |
| C  | -2.89681900 | -1.10045500 | 0.00011700  |
| N  | -2.05569100 | -0.00007800 | 0.00025900  |
| H  | -1.33819200 | -5.13327300 | -0.00009800 |
| H  | 1.33869200  | -5.13314300 | -0.00010500 |
| H  | 0.00005300  | -1.09933300 | -0.00015900 |
| H  | 5.15069700  | -1.33900700 | 0.00025300  |
| H  | 5.15046600  | 1.33966300  | 0.00016700  |
| H  | 1.33795400  | 5.13351000  | -0.00022000 |
| H  | -1.33845200 | 5.13338200  | -0.00021100 |
| H  | -0.00005400 | 1.09935300  | -0.00047700 |
| H  | -5.15060000 | 1.33915800  | 0.00007100  |
| H  | -5.15056400 | -1.33951100 | 0.00024000  |
| Cl | 3.74053100  | 3.72087200  | 0.00011900  |
| Cl | -3.74089200 | 3.72051300  | -0.00001200 |
| Cl | -3.74043800 | -3.72107700 | 0.00002900  |
| Cl | 3.74079900  | -3.72071600 | -0.00015300 |



### Cartesian coordinates of the DFT optimized structure [1] - in the gas phase

|    |             |             |             |
|----|-------------|-------------|-------------|
| C  | -1.13915300 | 2.94027700  | -0.00001300 |
| C  | -0.69876900 | 4.28974800  | -0.00002600 |
| C  | 0.69938800  | 4.28964900  | -0.00001800 |
| C  | 1.13957900  | 2.94011400  | -0.00001100 |
| N  | 0.00015600  | 2.14336500  | -0.00005500 |
| C  | -2.45560200 | 2.42261600  | -0.00000300 |
| C  | 2.45595300  | 2.42226300  | 0.00000100  |
| C  | 2.89928800  | 1.10799900  | 0.00000300  |
| C  | 4.30274200  | 0.67934500  | 0.00000900  |
| C  | 4.30265600  | -0.67992900 | 0.00000800  |
| C  | 2.89916600  | -1.10842000 | 0.00000400  |
| N  | 2.05640900  | -0.00012800 | 0.00001800  |
| C  | 2.45559000  | -2.42256200 | -0.00000400 |
| C  | 1.13915600  | -2.94026800 | 0.00000000  |
| C  | 0.69877100  | -4.28973200 | 0.00000300  |
| C  | -0.69939000 | -4.28963200 | 0.00000000  |
| C  | -1.13958200 | -2.94010500 | 0.00000300  |
| N  | -0.00015600 | -2.14336900 | 0.00003100  |
| C  | -2.45594100 | -2.42221000 | 0.00000200  |
| C  | -2.89932700 | -1.10800400 | 0.00001100  |
| C  | -4.30275500 | -0.67930900 | 0.00000900  |
| C  | -4.30264300 | 0.67996500  | 0.00001700  |
| C  | -2.89912700 | 1.10841600  | 0.00000400  |
| N  | -2.05640900 | 0.00016600  | 0.00002900  |
| H  | -1.34687300 | 5.15072700  | -0.00002700 |
| H  | 1.34761400  | 5.15053500  | -0.00001300 |
| H  | 0.00008300  | 1.12814000  | -0.00008500 |
| H  | 5.15713000  | 1.33847100  | 0.00000800  |
| H  | 5.15696500  | -1.33916100 | 0.00000600  |
| H  | 1.34688000  | -5.15070500 | -0.00000200 |
| H  | -1.34762100 | -5.15051400 | -0.00000500 |
| H  | -0.00008400 | -1.12814200 | 0.00004900  |
| H  | -5.15716000 | -1.33841700 | 0.00000400  |
| H  | -5.15693600 | 1.33921500  | 0.00001600  |
| Cl | -3.76745000 | -3.73385800 | -0.00001300 |
| Cl | -3.76687300 | 3.73435000  | 0.00000600  |
| Cl | 3.76741400  | 3.73380800  | 0.00001700  |
| Cl | 3.76690900  | -3.73440000 | -0.00001600 |

**Cartesian coordinates of the DFT optimized structure [1]<sup>2-</sup> in the gas phase**

|    |             |             |             |
|----|-------------|-------------|-------------|
| C  | 1.12980800  | -2.98360400 | -0.00000200 |
| C  | 0.69071800  | -4.31902900 | 0.00000700  |
| C  | -0.73053400 | -4.31252500 | 0.00001300  |
| C  | -1.15737000 | -2.97311400 | 0.00000700  |
| N  | -0.01012200 | -2.18058000 | -0.00001500 |
| C  | 2.45450700  | -2.43649000 | -0.00001000 |
| C  | -2.47697400 | -2.41383200 | 0.00000500  |
| C  | -2.90472900 | -1.10274200 | -0.00001300 |
| C  | -4.30909400 | -0.65969900 | -0.00002900 |
| C  | -4.30278900 | 0.69942100  | -0.00004500 |
| C  | -2.89437600 | 1.12941400  | -0.00001400 |
| N  | -2.05529100 | 0.00942300  | -0.00003200 |
| C  | -2.45450700 | 2.43649000  | -0.00000400 |
| C  | -1.12980800 | 2.98360400  | 0.00002000  |
| C  | -0.69071800 | 4.31902900  | 0.00003000  |
| C  | 0.73053400  | 4.31252500  | 0.00002900  |
| C  | 1.15737000  | 2.97311400  | 0.00003300  |
| N  | 0.01012200  | 2.18058000  | 0.00011200  |
| C  | 2.47697400  | 2.41383200  | 0.00001700  |
| C  | 2.90472900  | 1.10274200  | -0.00000100 |
| C  | 4.30909400  | 0.65969900  | -0.00004500 |
| C  | 4.30278900  | -0.69942100 | -0.00003000 |
| C  | 2.89437600  | -1.12941400 | -0.00001900 |
| N  | 2.05529100  | -0.00942300 | -0.00002600 |
| H  | 1.33385200  | -5.18500800 | 0.00000900  |
| H  | -1.38155000 | -5.17259900 | 0.00002000  |
| H  | -0.00543400 | -1.16387000 | -0.00002000 |
| H  | -5.16856900 | -1.31443600 | -0.00003200 |
| H  | -5.15614700 | 1.36211000  | -0.00005800 |
| H  | -1.33385200 | 5.18500800  | 0.00001700  |
| H  | 1.38155000  | 5.17260000  | 0.00001400  |
| H  | 0.00543400  | 1.16387000  | 0.00017800  |
| H  | 5.16856900  | 1.31443600  | -0.00006000 |
| H  | 5.15614700  | -1.36211000 | -0.00003700 |
| Cl | -3.78215000 | 3.76762500  | -0.00002900 |
| Cl | 3.81681600  | 3.73269200  | -0.00000500 |
| Cl | 3.78215000  | -3.76762500 | 0.00000300  |
| Cl | -3.81681600 | -3.73269200 | 0.00003000  |

### Cartesian coordinates of the DFT optimized structure [1-H] in the gas phase

|    |             |             |             |
|----|-------------|-------------|-------------|
| C  | -1.14343900 | -2.93229300 | 0.10314600  |
| C  | -0.69813400 | -4.18076000 | 0.57538800  |
| C  | 0.70640000  | -4.17940200 | 0.57513500  |
| C  | 1.14914300  | -2.93010900 | 0.10267800  |
| N  | 0.00206200  | -2.16512500 | -0.17434600 |
| C  | -2.46855900 | -2.44420400 | -0.05409700 |
| C  | 2.47329700  | -2.43952800 | -0.05499100 |
| C  | 2.92263100  | -1.13489100 | -0.13702400 |
| C  | 4.28158900  | -0.66788400 | -0.32260500 |
| C  | 4.28682600  | 0.70186000  | -0.28124900 |
| C  | 2.93454800  | 1.16058100  | -0.08038200 |
| N  | 2.13505200  | 0.01529900  | -0.01372600 |
| C  | 2.44125100  | 2.44610100  | 0.03609500  |
| C  | 1.10142900  | 2.88945200  | 0.14720000  |
| C  | 0.68180800  | 4.26932600  | 0.24928900  |
| C  | -0.69005800 | 4.26805200  | 0.24883400  |
| C  | -1.10704000 | 2.88736700  | 0.14668400  |
| N  | -0.00203400 | 2.04144700  | 0.10645800  |
| C  | -2.44599900 | 2.44148000  | 0.03519100  |
| C  | -2.93676300 | 1.15496900  | -0.08098300 |
| C  | -4.28816100 | 0.69354900  | -0.28154700 |
| C  | -4.28030700 | -0.67620300 | -0.32201000 |
| C  | -2.92039500 | -1.14046300 | -0.13647100 |
| N  | -2.13497000 | 0.01127200  | -0.01408200 |
| H  | -1.34179700 | -4.97852900 | 0.90866700  |
| H  | 1.35173100  | -4.97591800 | 0.90819700  |
| H  | 0.00115800  | -1.41200800 | -0.84949000 |
| H  | 5.12885400  | -1.31796500 | -0.46686300 |
| H  | 5.14060700  | 1.35132900  | -0.38649100 |
| H  | 1.15579100  | 0.09045800  | 0.22503800  |
| H  | 1.33568900  | 5.12482400  | 0.30283800  |
| H  | -1.34557100 | 5.12232500  | 0.30193500  |
| H  | -5.14320800 | 1.34130700  | -0.38705800 |
| H  | -5.12632900 | -1.32802200 | -0.46573100 |
| H  | -1.15588200 | 0.08865200  | 0.22484400  |
| Cl | -3.72557800 | 3.75556800  | 0.00743000  |
| Cl | 3.71834400  | 3.76271900  | 0.00937500  |
| Cl | 3.76090800  | -3.74231200 | -0.08158300 |
| Cl | -3.75380500 | -3.74942800 | -0.07967500 |

### Cartesian coordinates of the DFT optimized structure [1-H]<sup>-</sup> in the gas phase

|    |             |             |             |
|----|-------------|-------------|-------------|
| C  | -1.14869700 | -2.93888700 | 0.18089800  |
| C  | -0.71182200 | -4.09399200 | 0.82900500  |
| C  | 0.71170000  | -4.09401400 | 0.82900200  |
| C  | 1.14860700  | -2.93892200 | 0.18089400  |
| N  | -0.00003500 | -2.23402100 | -0.21232500 |
| C  | -2.47889100 | -2.44234200 | -0.06257000 |
| C  | 2.47881500  | -2.44241700 | -0.06257700 |
| C  | 2.92592900  | -1.15102000 | -0.14937200 |
| C  | 4.28715100  | -0.67158600 | -0.37042300 |
| C  | 4.29242700  | 0.69425900  | -0.31982700 |
| C  | 2.94350300  | 1.16463400  | -0.08576800 |
| N  | 2.14223600  | 0.00561500  | -0.00740900 |
| C  | 2.45294300  | 2.43550300  | 0.04150400  |
| C  | 1.10752900  | 2.90699200  | 0.17938700  |
| C  | 0.69578100  | 4.26558700  | 0.32538600  |
| C  | -0.69565200 | 4.26560800  | 0.32538100  |
| C  | -1.10744100 | 2.90702600  | 0.17938400  |
| N  | 0.00003200  | 2.06111700  | 0.10823400  |
| C  | -2.45286800 | 2.43557800  | 0.04149800  |
| C  | -2.94346700 | 1.16472300  | -0.08577200 |
| C  | -4.29240500 | 0.69438900  | -0.31983100 |
| C  | -4.28717100 | -0.67145700 | -0.37042100 |
| C  | -2.92596500 | -1.15093200 | -0.14936800 |
| N  | -2.14223500 | 0.00567900  | -0.00741000 |
| H  | -1.35775100 | -4.83946100 | 1.26577300  |
| H  | 1.35760800  | -4.83950200 | 1.26576900  |
| H  | -0.00002500 | -1.51173500 | -0.91822300 |
| H  | 5.13135800  | -1.32239300 | -0.53219800 |
| H  | 5.14554800  | 1.34384800  | -0.43692500 |
| H  | 1.16209100  | 0.07950400  | 0.22383500  |
| H  | 1.34697800  | 5.12271500  | 0.40239100  |
| H  | -1.34682300 | 5.12275700  | 0.40238300  |
| H  | -5.14550500 | 1.34400400  | -0.43693400 |
| H  | -5.13139900 | -1.32223800 | -0.53219500 |
| H  | -1.16209000 | 0.07953800  | 0.22383900  |
| Cl | 3.76520900  | -3.77421100 | -0.18564800 |
| Cl | 3.74311600  | 3.76944600  | -0.01769500 |
| Cl | -3.74300000 | 3.76956000  | -0.01770700 |
| Cl | -3.76532600 | -3.77409800 | -0.18563300 |

### Cartesian coordinates of the DFT optimized structure [1-HH] in the gas phase

|    |             |             |             |
|----|-------------|-------------|-------------|
| C  | 1.14592600  | -2.89175600 | 0.31828900  |
| C  | 0.70926400  | -4.05293300 | 0.96210100  |
| C  | -0.70758500 | -4.05322200 | 0.96210200  |
| C  | -1.14472300 | -2.89222900 | 0.31828200  |
| N  | 0.00045400  | -2.17490600 | -0.05213800 |
| C  | 2.47454300  | -2.43808800 | -0.00426700 |
| C  | -2.47352500 | -2.43911000 | -0.00428000 |
| C  | -2.90774100 | -1.16326600 | -0.21176500 |
| C  | -4.20156200 | -0.68259800 | -0.66773100 |
| C  | -4.20184400 | 0.68085000  | -0.66771500 |
| C  | -2.90822900 | 1.16204400  | -0.21172500 |
| N  | -2.11079700 | -0.00044600 | 0.00543200  |
| C  | -2.47454400 | 2.43807300  | -0.00423100 |
| C  | -1.14592900 | 2.89177400  | 0.31824500  |
| C  | -0.70926200 | 4.05310400  | 0.96178300  |
| C  | 0.70758300  | 4.05339700  | 0.96177700  |
| C  | 1.14472600  | 2.89224700  | 0.31824000  |
| N  | -0.00045400 | 2.17481300  | -0.05198800 |
| C  | 2.47352700  | 2.43909500  | -0.00424200 |
| C  | 2.90774300  | 1.16324600  | -0.21173300 |
| C  | 4.20156300  | 0.68259000  | -0.66770600 |
| C  | 4.20184200  | -0.68085700 | -0.66774100 |
| C  | 2.90822800  | -1.16206300 | -0.21175700 |
| N  | 2.11079600  | 0.00042500  | 0.00542900  |
| H  | 1.35365400  | -4.80940300 | 1.38099400  |
| H  | -1.35166700 | -4.80995600 | 1.38099400  |
| H  | 0.00030100  | -1.42129900 | -0.72412600 |
| H  | -5.01010500 | -1.33144600 | -0.96560500 |
| H  | -5.01065900 | 1.32936700  | -0.96557000 |
| H  | -1.35364900 | 4.80966900  | 1.38050700  |
| H  | 1.35166100  | 4.81023000  | 1.38049400  |
| H  | -0.00029900 | 1.42113700  | -0.72390000 |
| H  | 5.01010900  | 1.33144500  | -0.96555700 |
| H  | 5.01065300  | -1.32936800 | -0.96562100 |
| H  | 1.40101700  | 0.00026700  | 0.72633900  |
| H  | -1.40101700 | -0.00031200 | 0.72634100  |
| Cl | 3.71807000  | 3.77826200  | -0.15477500 |
| Cl | 3.71961200  | -3.77676100 | -0.15487000 |
| Cl | -3.71803700 | -3.77830100 | -0.15488700 |
| Cl | -3.71964500 | 3.77672200  | -0.15476100 |

### Cartesian coordinates of the DFT optimized structure [1-HH]<sup>+</sup> in the gas phase

|    |             |             |             |
|----|-------------|-------------|-------------|
| C  | -1.15064300 | 2.89253900  | 0.26301600  |
| C  | -0.70836500 | 4.12396800  | 0.79370700  |
| C  | 0.69083700  | 4.12691000  | 0.79379000  |
| C  | 1.13833200  | 2.89737000  | 0.26309400  |
| N  | -0.00454900 | 2.13368300  | -0.02481300 |
| C  | -2.47195300 | 2.44157700  | -0.00380600 |
| C  | 2.46152100  | 2.45207600  | -0.00380900 |
| C  | 2.90073700  | 1.15909100  | -0.21432700 |
| C  | 4.19113100  | 0.69458800  | -0.66041100 |
| C  | 4.19406600  | -0.67675900 | -0.66038300 |
| C  | 2.90565600  | -1.14676600 | -0.21431000 |
| N  | 2.11447200  | 0.00448200  | 0.00963600  |
| C  | 2.47195300  | -2.44161000 | -0.00379200 |
| C  | 1.15065900  | -2.89253200 | 0.26306200  |
| C  | 0.70836500  | -4.12396900 | 0.79372000  |
| C  | -0.69083700 | -4.12691600 | 0.79372800  |
| C  | -1.13832000 | -2.89738200 | 0.26300700  |
| N  | 0.00455300  | -2.13371300 | -0.02489800 |
| C  | -2.46153000 | -2.45204000 | -0.00382800 |
| C  | -2.90071900 | -1.15907100 | -0.21433500 |
| C  | -4.19117300 | -0.69456800 | -0.66038400 |
| C  | -4.19408500 | 0.67674900  | -0.66041400 |
| C  | -2.90563000 | 1.14675000  | -0.21432200 |
| N  | -2.11452000 | -0.00448100 | 0.00961600  |
| H  | -1.35418800 | 4.91088900  | 1.14913100  |
| H  | 1.33331200  | 4.91653900  | 1.14928100  |
| H  | -0.00285100 | 1.38354200  | -0.70252700 |
| H  | 4.99798700  | 1.34363900  | -0.96188100 |
| H  | 5.00370100  | -1.32234900 | -0.96182500 |
| H  | 1.35417000  | -4.91087500 | 1.14920900  |
| H  | -1.33332900 | -4.91654600 | 1.14918100  |
| H  | 0.00306500  | -1.38360200 | -0.70264800 |
| H  | -4.99802200 | -1.34363500 | -0.96184100 |
| H  | -5.00369600 | 1.32235800  | -0.96188100 |
| H  | -1.37238100 | -0.00291400 | 0.69698000  |
| H  | 1.37263200  | 0.00291500  | 0.69735700  |
| Cl | 3.73265700  | -3.74415300 | -0.07057900 |
| Cl | 3.71663600  | 3.75999400  | -0.07072400 |
| Cl | -3.73265000 | 3.74411900  | -0.07057500 |
| Cl | -3.71664800 | -3.75994800 | -0.07067100 |

### Cartesian coordinates of the DFT optimized structure [1-HH]<sup>2+</sup> in the gas phase

|    |             |             |             |
|----|-------------|-------------|-------------|
| C  | 1.15715600  | 2.88728300  | -0.23505800 |
| C  | 0.70942800  | 4.15468000  | -0.72322200 |
| C  | -0.67288500 | 4.16071900  | -0.72329500 |
| C  | -1.13171100 | 2.89735700  | -0.23495200 |
| N  | 0.00932500  | 2.11744700  | 0.02125700  |
| C  | 2.46851600  | 2.44682900  | -0.00010600 |
| C  | -2.44688600 | 2.46854600  | 0.00012500  |
| C  | -2.88728900 | 1.15717300  | 0.23513800  |
| C  | -4.15470300 | 0.70945400  | 0.72324300  |
| C  | -4.16079800 | -0.67287000 | 0.72319500  |
| C  | -2.89736800 | -1.13171300 | 0.23508500  |
| N  | -2.11744700 | 0.00932300  | -0.02111000 |
| C  | -2.46852900 | -2.44690300 | 0.00003000  |
| C  | -1.15717200 | -2.88727700 | -0.23501100 |
| C  | -0.70946900 | -4.15462200 | -0.72335000 |
| C  | 0.67284400  | -4.16077500 | -0.72317600 |
| C  | 1.13169500  | -2.89736200 | -0.23500600 |
| N  | -0.00932200 | -2.11744600 | 0.02125000  |
| C  | 2.44687300  | -2.46847100 | -0.00001200 |
| C  | 2.88729100  | -1.15715200 | 0.23501000  |
| C  | 4.15471200  | -0.70943800 | 0.72317500  |
| C  | 4.16081000  | 0.67285300  | 0.72312100  |
| C  | 2.89737100  | 1.13169100  | 0.23495400  |
| N  | 2.11743200  | -0.00932300 | -0.02115300 |
| H  | 1.35793900  | 4.94972400  | -1.05750800 |
| H  | -1.31437900 | 4.96139400  | -1.05768500 |
| H  | 0.00604100  | 1.37387600  | 0.70766900  |
| H  | -4.94976400 | 1.35793700  | 1.05754100  |
| H  | -4.96155000 | -1.31433600 | 1.05744900  |
| H  | -1.35797800 | -4.94960600 | -1.05778500 |
| H  | 1.31433800  | -4.96151000 | -1.05741500 |
| H  | -0.00607700 | -1.37387100 | 0.70765900  |
| H  | 4.94976200  | -1.35795000 | 1.05745200  |
| H  | 4.96155200  | 1.31434800  | 1.05735100  |
| H  | 1.37362400  | -0.00605800 | -0.70729100 |
| H  | -1.37380600 | 0.00605800  | -0.70744300 |
| Cl | 3.71191400  | -3.74472000 | 0.00012000  |
| Cl | -3.74471400 | -3.71190300 | -0.00014700 |
| Cl | -3.71188300 | 3.74473400  | 0.00002400  |
| Cl | 3.74474600  | 3.71188800  | -0.00005900 |

**Cartesian coordinates of the DFT optimized structure of *p*-toluenesulfonic acid (TsOH) in the gas phase**

|   |             |             |             |
|---|-------------|-------------|-------------|
| C | -2.70639100 | 0.00323200  | 0.01153100  |
| C | -1.98945400 | 1.21451900  | -0.01436600 |
| C | -0.59055900 | 1.22731600  | -0.06625800 |
| C | 0.06356100  | 0.00104800  | -0.08928500 |
| C | -0.59327000 | -1.22559600 | -0.06585800 |
| C | -1.99039300 | -1.21080700 | -0.01450300 |
| H | -2.52700300 | 2.15740900  | 0.00561000  |
| H | -0.03167000 | 2.15588800  | -0.09389400 |
| H | -0.03504600 | -2.15457100 | -0.09319800 |
| H | -2.52953400 | -2.15317200 | 0.00517100  |
| C | -4.21766700 | -0.00153700 | 0.04661300  |
| H | -4.61491800 | 0.98190600  | 0.31519000  |
| H | -4.63149400 | -0.27061900 | -0.93432300 |
| H | -4.59733000 | -0.73077500 | 0.77115400  |
| S | 1.92056700  | -0.00065400 | -0.14691400 |
| O | 2.49143300  | 1.40635000  | -0.72948000 |
| O | 2.48835300  | -1.40934400 | -0.72839600 |
| O | 2.17480600  | -0.00007200 | 1.66747600  |
| H | 3.14622500  | -0.00013000 | 1.85086500  |



**Cartesian coordinates of the DFT optimized structure of tosylate (TsO<sup>-</sup>) in the gas phase**

|   |             |             |             |
|---|-------------|-------------|-------------|
| C | -2.68689900 | -0.00053100 | -0.00000200 |
| C | -1.96233400 | -1.21002400 | -0.00000300 |
| C | -0.56315200 | -1.21004900 | 0.00000900  |
| C | 0.11218400  | 0.00904500  | -0.00000800 |
| C | -0.56754900 | 1.22035200  | -0.00001500 |
| C | -1.97172600 | 1.20918700  | 0.00001300  |
| H | -2.49915400 | -2.15672900 | 0.00001100  |
| H | 0.00065100  | -2.13690300 | 0.00002500  |
| H | 0.00748700  | 2.14082400  | -0.00000400 |
| H | -2.51521200 | 2.15177400  | 0.00002000  |
| C | -4.20256300 | -0.01183700 | -0.00000500 |
| H | -4.60078100 | -0.52821000 | -0.88413600 |
| H | -4.60079200 | -0.52840700 | 0.88400500  |
| H | -4.60518800 | 1.00743700  | 0.00011100  |
| S | 2.00583100  | 0.00433500  | -0.00001100 |
| O | 2.41758300  | -0.81555100 | -1.39042200 |
| O | 2.41756900  | -0.81561400 | 1.39039900  |
| O | 2.38633900  | 1.62416400  | 0.00004900  |

**Cartesian coordinates of the DFT optimized structure of acetic acid (AcOH) in the gas phase**

|   |             |             |             |
|---|-------------|-------------|-------------|
| C | -0.07469800 | 0.13141800  | -0.00007000 |
| O | -0.61797500 | 1.23976300  | 0.00001000  |
| C | 1.39726400  | -0.14320700 | -0.00001000 |
| H | 1.66955000  | -0.73161100 | 0.88256100  |
| H | 1.66944800  | -0.73284900 | -0.88174500 |
| H | 1.94500000  | 0.79925600  | -0.00055300 |
| O | -0.81248000 | -1.04153700 | -0.00000400 |
| H | -1.77575100 | -0.84987200 | 0.00016800  |

**Cartesian coordinates of the DFT optimized structure of acetate ( $\text{AcO}^-$ ) in the gas phase**

|   |             |             |             |
|---|-------------|-------------|-------------|
| C | 0.19443700  | 0.00071300  | -0.00002400 |
| O | 0.80637500  | -1.13131900 | -0.00000800 |
| C | -1.35903900 | -0.04379300 | 0.00003300  |
| H | -1.74257600 | 0.48128500  | 0.88575800  |
| H | -1.74272700 | 0.48243400  | -0.88493600 |
| H | -1.72137600 | -1.07753900 | -0.00057200 |
| O | 0.71791200  | 1.17785700  | -0.00003000 |

### Cartesian coordinates of the solvated DFT optimized structure [1] in THF

|    |             |             |             |
|----|-------------|-------------|-------------|
| C  | -1.13633000 | 2.91143200  | -0.00019300 |
| C  | -0.68783000 | 4.27783000  | -0.00038400 |
| C  | 0.68781100  | 4.27783300  | -0.00035100 |
| C  | 1.13631700  | 2.91143700  | -0.00019000 |
| N  | -0.00000500 | 2.11601900  | -0.00031100 |
| C  | -2.44407200 | 2.42444700  | -0.00008400 |
| C  | 2.44406100  | 2.42445800  | -0.00008300 |
| C  | 2.89675000  | 1.10114800  | 0.00017400  |
| C  | 4.29631900  | 0.68093900  | 0.00048600  |
| C  | 4.29632100  | -0.68092900 | 0.00043100  |
| C  | 2.89673900  | -1.10112800 | 0.00020700  |
| N  | 2.05481800  | 0.00000500  | 0.00074800  |
| C  | 2.44406900  | -2.42443600 | -0.00002200 |
| C  | 1.13632300  | -2.91142700 | -0.00012300 |
| C  | 0.68782900  | -4.27783800 | -0.00031500 |
| C  | -0.68781000 | -4.27784100 | -0.00026100 |
| C  | -1.13631000 | -2.91143200 | -0.00009700 |
| N  | 0.00000500  | -2.11602700 | -0.00030300 |
| C  | -2.44405800 | -2.42444700 | 0.00002600  |
| C  | -2.89673400 | -1.10114100 | 0.00023200  |
| C  | -4.29631800 | -0.68094800 | 0.00046700  |
| C  | -4.29632300 | 0.68092000  | 0.00046900  |
| C  | -2.89675500 | 1.10113600  | 0.00017600  |
| N  | -2.05481800 | -0.00000400 | 0.00071100  |
| H  | -1.33498700 | 5.13925500  | -0.00046100 |
| H  | 1.33496400  | 5.13926100  | -0.00040400 |
| H  | -0.00000200 | 1.10188000  | -0.00040900 |
| H  | 5.15215800  | 1.33697500  | 0.00050300  |
| H  | 5.15216300  | -1.33696200 | 0.00041300  |
| H  | 1.33500800  | -5.13924500 | -0.00039400 |
| H  | -1.33498500 | -5.13925100 | -0.00029900 |
| H  | 0.00000200  | -1.10188700 | -0.00045000 |
| H  | -5.15215700 | -1.33698500 | 0.00047900  |
| H  | -5.15216500 | 1.33695200  | 0.00047300  |
| Cl | 3.74161100  | -3.72156600 | -0.00014000 |
| Cl | -3.74159400 | -3.72158300 | -0.00002600 |
| Cl | -3.74161000 | 3.72156500  | -0.00018900 |
| Cl | 3.74159400  | 3.72158100  | -0.00015900 |

### Cartesian coordinates of the solvated DFT optimized structure [1] - in THF

|    |             |             |             |
|----|-------------|-------------|-------------|
| C  | -1.13944200 | -2.94259700 | 0.00002800  |
| C  | -0.69833900 | -4.29179500 | 0.00005900  |
| C  | 0.70005400  | -4.29151900 | 0.00004300  |
| C  | 1.14062300  | -2.94214500 | 0.00002800  |
| N  | 0.00043200  | -2.14443400 | 0.00013500  |
| C  | -2.45636100 | -2.42474700 | -0.00000100 |
| C  | 2.45733500  | -2.42377000 | -0.00000100 |
| C  | 2.89912200  | -1.10898500 | -0.00000900 |
| C  | 4.30163500  | -0.67888200 | -0.00004700 |
| C  | 4.30136500  | 0.68059200  | -0.00003100 |
| C  | 2.89868600  | 1.11014200  | -0.00001200 |
| N  | 2.05324700  | 0.00040500  | -0.00004200 |
| C  | 2.45636100  | 2.42474100  | 0.00000900  |
| C  | 1.13944300  | 2.94260000  | 0.00000500  |
| C  | 0.69834000  | 4.29179400  | 0.00000400  |
| C  | -0.70005500 | 4.29151800  | 0.00002000  |
| C  | -1.14062400 | 2.94214800  | 0.00000400  |
| N  | -0.00043200 | 2.14443700  | -0.00005100 |
| C  | -2.45733400 | 2.42376500  | 0.00000700  |
| C  | -2.89913200 | 1.10898800  | -0.00002200 |
| C  | -4.30163800 | 0.67887300  | -0.00002700 |
| C  | -4.30136200 | -0.68060100 | -0.00007200 |
| C  | -2.89867600 | -1.11013900 | -0.00001700 |
| N  | -2.05324800 | -0.00040900 | -0.00006800 |
| H  | -1.34244300 | -5.15592100 | 0.00005700  |
| H  | 1.34450000  | -5.15539000 | 0.00002900  |
| H  | 0.00023100  | -1.12974000 | 0.00021500  |
| H  | 5.15885300  | -1.33424300 | -0.00006100 |
| H  | 5.15832100  | 1.33629500  | -0.00003300 |
| H  | 1.34244300  | 5.15592000  | 0.00001200  |
| H  | -1.34450000 | 5.15538900  | 0.00003800  |
| H  | -0.00023100 | 1.12974300  | -0.00009200 |
| H  | -5.15885800 | 1.33423100  | -0.00001400 |
| H  | -5.15831500 | -1.33630700 | -0.00009200 |
| Cl | -3.76665700 | 3.73222600  | 0.00005500  |
| Cl | -3.76516200 | -3.73371800 | -0.00003200 |
| Cl | 3.76665500  | -3.73222100 | -0.00004200 |
| Cl | 3.76516400  | 3.73372100  | 0.00003700  |

**Cartesian coordinates of the solvated DFT optimized structure [1]<sup>2-</sup> in THF**

|    |             |             |             |
|----|-------------|-------------|-------------|
| C  | 1.19229600  | -2.95723900 | 0.00002200  |
| C  | 0.78042500  | -4.30035300 | 0.00001700  |
| C  | -0.64066900 | -4.32326600 | 0.00002100  |
| C  | -1.09563600 | -2.99421400 | 0.00002700  |
| N  | 0.03540000  | -2.17599000 | 0.00005800  |
| C  | 2.50755400  | -2.38651600 | 0.00000500  |
| C  | -2.42863900 | -2.46624400 | 0.00001300  |
| C  | -2.87992900 | -1.16455700 | 0.00000200  |
| C  | -4.29160000 | -0.74891400 | -0.00002400 |
| C  | -4.31378300 | 0.60940200  | -0.00005600 |
| C  | -2.91639100 | 1.07087000  | 0.00000800  |
| N  | -2.04856000 | -0.03302300 | 0.00000200  |
| C  | -2.50755400 | 2.38651600  | 0.00001100  |
| C  | -1.19229600 | 2.95723900  | 0.00005400  |
| C  | -0.78042500 | 4.30035300  | 0.00006200  |
| C  | 0.64066900  | 4.32326600  | 0.00004500  |
| C  | 1.09563600  | 2.99421400  | 0.00005700  |
| N  | -0.03540000 | 2.17599000  | 0.00020900  |
| C  | 2.42863900  | 2.46624400  | 0.00001900  |
| C  | 2.87992900  | 1.16455700  | 0.00002100  |
| C  | 4.29160000  | 0.74891400  | -0.00005500 |
| C  | 4.31378300  | -0.60940200 | -0.00001000 |
| C  | 2.91639100  | -1.07087000 | 0.00000600  |
| N  | 2.04856000  | 0.03302300  | 0.00002100  |
| H  | 1.43690200  | -5.15607800 | 0.00000100  |
| H  | -1.26921700 | -5.19966300 | 0.00000800  |
| H  | 0.01909500  | -1.16024900 | 0.00008600  |
| H  | -5.13977000 | -1.41748200 | -0.00003600 |
| H  | -5.18340000 | 1.24979900  | -0.00009100 |
| H  | -1.43690200 | 5.15607800  | 0.00003200  |
| H  | 1.26921700  | 5.19966300  | 0.00000300  |
| H  | -0.01909500 | 1.16024900  | 0.00033100  |
| H  | 5.13977000  | 1.41748200  | -0.00009800 |
| H  | 5.18340000  | -1.24979900 | -0.00002400 |
| Cl | -3.85181300 | 3.68494100  | -0.00008400 |
| Cl | 3.73079900  | 3.80686600  | -0.00009300 |
| Cl | 3.85181300  | -3.68494100 | -0.00003500 |
| Cl | -3.73079900 | -3.80686600 | -0.00000800 |

### Cartesian coordinates of the solvated DFT optimized structure [1-H] in THF

|    |             |             |             |
|----|-------------|-------------|-------------|
| C  | -1.14242700 | -2.93112800 | 0.10564600  |
| C  | -0.69930200 | -4.16214900 | 0.62716400  |
| C  | 0.70501200  | -4.16124000 | 0.62693800  |
| C  | 1.14636700  | -2.92959200 | 0.10543500  |
| N  | 0.00142200  | -2.17810300 | -0.20441300 |
| C  | -2.46676900 | -2.44313600 | -0.06194800 |
| C  | 2.47003800  | -2.43981900 | -0.06248800 |
| C  | 2.92176800  | -1.13676000 | -0.14909600 |
| C  | 4.28189300  | -0.67028500 | -0.33630800 |
| C  | 4.28810700  | 0.69876700  | -0.28977700 |
| C  | 2.93419400  | 1.15737200  | -0.08438300 |
| N  | 2.13591600  | 0.01280500  | -0.01952100 |
| C  | 2.44202000  | 2.44281300  | 0.03631800  |
| C  | 1.10329300  | 2.89283900  | 0.14960900  |
| C  | 0.68437600  | 4.27128700  | 0.26439300  |
| C  | -0.69014700 | 4.27039900  | 0.26409100  |
| C  | -1.10722700 | 2.89140600  | 0.14921800  |
| N  | -0.00141300 | 2.04691600  | 0.10015300  |
| C  | -2.44528100 | 2.43960800  | 0.03560000  |
| C  | -2.93570700 | 1.15346700  | -0.08489900 |
| C  | -4.28903600 | 0.69299800  | -0.28988200 |
| C  | -4.28101500 | -0.67607400 | -0.33571400 |
| C  | -2.92021900 | -1.14066300 | -0.14888800 |
| N  | -2.13585200 | 0.01000700  | -0.01999000 |
| H  | -1.34117400 | -4.94532600 | 0.99719800  |
| H  | 1.34802000  | -4.94360100 | 0.99674000  |
| H  | 0.00088800  | -1.46136100 | -0.91893800 |
| H  | 5.13064500  | -1.31748600 | -0.48537400 |
| H  | 5.14410000  | 1.34539100  | -0.39490100 |
| H  | 1.15359900  | 0.08014400  | 0.20759100  |
| H  | 1.33604900  | 5.12828500  | 0.32718000  |
| H  | -1.34296700 | 5.12654100  | 0.32661000  |
| H  | -5.14594700 | 1.33842700  | -0.39489300 |
| H  | -5.12897000 | -1.32445200 | -0.48414900 |
| H  | -1.15344600 | 0.07890200  | 0.20633800  |
| Cl | -3.72816400 | 3.75608600  | 0.01204800  |
| Cl | 3.72314700  | 3.76100100  | 0.01336600  |
| Cl | 3.75835300  | -3.74627900 | -0.08698400 |
| Cl | -3.75339300 | -3.75124900 | -0.08567500 |

### Cartesian coordinates of the solvated DFT optimized structure [1-H]<sup>-</sup> in THF

|    |             |             |             |
|----|-------------|-------------|-------------|
| C  | -1.14897800 | -2.92242200 | 0.20970200  |
| C  | -0.71454900 | -4.01568900 | 0.96128300  |
| C  | 0.70852200  | -4.01681000 | 0.96116500  |
| C  | 1.14455000  | -2.92412300 | 0.20966300  |
| N  | -0.00173200 | -2.25953300 | -0.24750400 |
| C  | -2.47943700 | -2.44125800 | -0.07005300 |
| C  | 2.47572200  | -2.44494600 | -0.07012800 |
| C  | 2.92727700  | -1.15752500 | -0.17094500 |
| C  | 4.28612000  | -0.67802300 | -0.41184900 |
| C  | 4.29348500  | 0.68662800  | -0.35445600 |
| C  | 2.94515200  | 1.15731700  | -0.09740400 |
| N  | 2.14621700  | -0.00113000 | -0.01115900 |
| C  | 2.45805200  | 2.42774700  | 0.04178900  |
| C  | 1.11176500  | 2.90106500  | 0.19580300  |
| C  | 0.70098700  | 4.25387700  | 0.37925300  |
| C  | -0.69460300 | 4.25488400  | 0.37934400  |
| C  | -1.10736000 | 2.90270700  | 0.19566400  |
| N  | 0.00158500  | 2.05863500  | 0.10074700  |
| C  | -2.45434300 | 2.43139500  | 0.04154900  |
| C  | -2.94334600 | 1.16170600  | -0.09773700 |
| C  | -4.29240300 | 0.69305700  | -0.35472100 |
| C  | -4.28713500 | -0.67161000 | -0.41194000 |
| C  | -2.92901200 | -1.15316000 | -0.17107400 |
| N  | -2.14611700 | 0.00206300  | -0.01178800 |
| H  | -1.35840000 | -4.71697800 | 1.46959400  |
| H  | 1.35134800  | -4.71909800 | 1.46939200  |
| H  | -0.00128000 | -1.60737500 | -1.01927700 |
| H  | 5.13054000  | -1.32471300 | -0.58938800 |
| H  | 5.14819800  | 1.33243600  | -0.48094500 |
| H  | 1.16229200  | 0.06281800  | 0.20432300  |
| H  | 1.34959200  | 5.11091400  | 0.48101500  |
| H  | -1.34195700 | 5.11286000  | 0.48116500  |
| H  | -5.14615100 | 1.34015400  | -0.48114500 |
| H  | -5.13256400 | -1.31703300 | -0.58928700 |
| H  | -1.16200100 | 0.06454600  | 0.20325300  |
| Cl | 3.74855200  | -3.78761500 | -0.21510500 |
| Cl | 3.74430300  | 3.76415200  | -0.02484900 |
| Cl | -3.73862000 | 3.76970900  | -0.02486900 |
| Cl | -3.75435600 | -3.78199100 | -0.21460200 |



### Cartesian coordinates of the solvated DFT optimized structure [1-HH] in THF

|    |             |             |             |
|----|-------------|-------------|-------------|
| C  | 1.05567700  | -2.91327900 | 0.31949700  |
| C  | 0.59419200  | -3.99217500 | 1.08148300  |
| C  | -0.82282300 | -3.94759500 | 1.09761900  |
| C  | -1.23199700 | -2.84109600 | 0.34555400  |
| N  | -0.07227500 | -2.21044600 | -0.11634700 |
| C  | 2.39473800  | -2.51024200 | -0.03330000 |
| C  | -2.54803400 | -2.35668600 | 0.01111100  |
| C  | -2.94976600 | -1.07055600 | -0.20203700 |
| C  | -4.22599400 | -0.55615200 | -0.68092500 |
| C  | -4.18254600 | 0.80627100  | -0.69745200 |
| C  | -2.87650600 | 1.24911400  | -0.22754900 |
| N  | -2.13588300 | 0.06758400  | 0.02224200  |
| C  | -2.39474900 | 2.51011500  | -0.03242400 |
| C  | -1.05568800 | 2.91327100  | 0.32007200  |
| C  | -0.59413200 | 3.99331500  | 1.08041600  |
| C  | 0.82285700  | 3.94871600  | 1.09659600  |
| C  | 1.23201300  | 2.84106600  | 0.34619100  |
| N  | 0.07224400  | 2.20964300  | -0.11459500 |
| C  | 2.54804900  | 2.35654300  | 0.01206400  |
| C  | 2.94981200  | 1.07045400  | -0.20139600 |
| C  | 4.22600500  | 0.55625400  | -0.68058100 |
| C  | 4.18252300  | -0.80615900 | -0.69780300 |
| C  | 2.87651000  | -1.24920200 | -0.22798600 |
| N  | 2.13594700  | -0.06776300 | 0.02247100  |
| H  | 1.22059000  | -4.71814200 | 1.57627700  |
| H  | -1.48204900 | -4.63396700 | 1.60599800  |
| H  | -0.06298000 | -1.53025500 | -0.86307700 |
| H  | -5.05180600 | -1.18079300 | -0.98329100 |
| H  | -4.96748500 | 1.47454800  | -1.01493800 |
| H  | -1.22048200 | 4.72011600  | 1.57403400  |
| H  | 1.48210300  | 4.63590900  | 1.60382700  |
| H  | 0.06291000  | 1.52826100  | -0.86022000 |
| H  | 5.05180300  | 1.18102200  | -0.98272300 |
| H  | 4.96741100  | -1.47430200 | -1.01569500 |
| H  | 1.36544300  | -0.05435800 | 0.67470200  |
| H  | -1.36530100 | 0.05384700  | 0.67437300  |
| Cl | 3.82947200  | 3.67114000  | -0.14825300 |
| Cl | 3.58676800  | -3.90166000 | -0.23008500 |
| Cl | -3.82936700 | -3.67134000 | -0.14972500 |
| Cl | -3.58694600 | 3.90145600  | -0.22844100 |

### Cartesian coordinates of the solvated DFT optimized structure [1-HH]<sup>+</sup> in THF

|    |             |             |             |
|----|-------------|-------------|-------------|
| C  | -1.38202500 | 2.78763000  | 0.26507300  |
| C  | -1.03866000 | 4.04566900  | 0.81125900  |
| C  | 0.35406600  | 4.16484000  | 0.79444300  |
| C  | 0.89339600  | 2.98209700  | 0.23822700  |
| N  | -0.18405000 | 2.13915400  | -0.05834700 |
| C  | -2.66257200 | 2.22517800  | 0.01892100  |
| C  | 2.24691400  | 2.64202300  | -0.02707900 |
| C  | 2.79797500  | 1.39010000  | -0.21437200 |
| C  | 4.12237700  | 1.03212700  | -0.66558600 |
| C  | 4.24017700  | -0.33284100 | -0.64802800 |
| C  | 2.99496100  | -0.90097000 | -0.18740900 |
| N  | 2.12132900  | 0.18073200  | 0.03915000  |
| C  | 2.66257200  | -2.22517800 | 0.01892800  |
| C  | 1.38202400  | -2.78763100 | 0.26507300  |
| C  | 1.03865600  | -4.04567100 | 0.81125400  |
| C  | -0.35407100 | -4.16484100 | 0.79442800  |
| C  | -0.89339700 | -2.98209800 | 0.23821000  |
| N  | 0.18405000  | -2.13915400 | -0.05835400 |
| C  | -2.24691400 | -2.64202300 | -0.02710300 |
| C  | -2.79797400 | -1.39009900 | -0.21439400 |
| C  | -4.12237300 | -1.03212400 | -0.66561400 |
| C  | -4.24017400 | 0.33284300  | -0.64805000 |
| C  | -2.99495900 | 0.90097100  | -0.18742200 |
| N  | -2.12133100 | -0.18073300 | 0.03913800  |
| H  | -1.74237600 | 4.76770700  | 1.19282400  |
| H  | 0.93387900  | 4.99634400  | 1.16128200  |
| H  | -0.13021200 | 1.38725200  | -0.73308100 |
| H  | 4.86788700  | 1.74164600  | -0.98678100 |
| H  | 5.09660700  | -0.91234800 | -0.95314100 |
| H  | 1.74236800  | -4.76770900 | 1.19282300  |
| H  | -0.93388600 | -4.99634600 | 1.16126300  |
| H  | 0.13022000  | -1.38725500 | -0.73309300 |
| H  | -4.86788100 | -1.74164300 | -0.98681700 |
| H  | -5.09660200 | 0.91235200  | -0.95316500 |
| H  | -1.36614400 | -0.12571100 | 0.70995900  |
| H  | 1.36615200  | 0.12570900  | 0.70998400  |
| Cl | 4.03377300  | -3.42410700 | -0.03178400 |
| Cl | 3.39220900  | 4.05629000  | -0.11930400 |
| Cl | -4.03377300 | 3.42410600  | -0.03179200 |
| Cl | -3.39220800 | -4.05629000 | -0.11933900 |

**Cartesian coordinates of the solvated DFT optimized structure [1-HH]<sup>2+</sup> in THF**

|    |             |             |             |
|----|-------------|-------------|-------------|
| C  | -0.81453200 | -2.99612000 | -0.23096500 |
| C  | -0.22667200 | -4.19820700 | -0.74162100 |
| C  | 1.14418200  | -4.04753000 | -0.73525600 |
| C  | 1.45173400  | -2.74649800 | -0.22122400 |
| N  | 0.23416000  | -2.11592000 | 0.05447900  |
| C  | -2.16570200 | -2.70460400 | -0.00915600 |
| C  | 2.70465700  | -2.16576300 | 0.00959500  |
| C  | 2.99603600  | -0.81458900 | 0.23164600  |
| C  | 4.19859800  | -0.22661400 | 0.74110500  |
| C  | 4.04787300  | 1.14421200  | 0.73467300  |
| C  | 2.74634300  | 1.45165600  | 0.22176400  |
| N  | 2.11550200  | 0.23403300  | -0.05294100 |
| C  | 2.16572000  | 2.70460000  | -0.00929900 |
| C  | 0.81455300  | 2.99613900  | -0.23106800 |
| C  | 0.22663300  | 4.19829400  | -0.74149300 |
| C  | -1.14422200 | 4.04761000  | -0.73499300 |
| C  | -1.45172000 | 2.74650700  | -0.22109400 |
| N  | -0.23410800 | 2.11589100  | 0.05437200  |
| C  | -2.70463400 | 2.16574400  | 0.00975800  |
| C  | -2.99601400 | 0.81457400  | 0.23177900  |
| C  | -4.19871100 | 0.22658300  | 0.74094900  |
| C  | -4.04800200 | -1.14423900 | 0.73452500  |
| C  | -2.74634200 | -1.45167500 | 0.22193000  |
| N  | -2.11543400 | -0.23404900 | -0.05256100 |
| H  | -0.78257500 | -5.04980400 | -1.09885600 |
| H  | 1.87481300  | -4.75797600 | -1.08664900 |
| H  | 0.14920900  | -1.37241900 | 0.73618900  |
| H  | 5.05060500  | -0.78244600 | 1.09746600  |
| H  | 4.75867800  | 1.87493500  | 1.08513800  |
| H  | 0.78249000  | 5.04995500  | -1.09864300 |
| H  | -1.87489500 | 4.75811000  | -1.08618800 |
| H  | -0.14901600 | 1.37236400  | 0.73604500  |
| H  | -5.05082100 | 0.78241000  | 1.09706600  |
| H  | -4.75891700 | -1.87497200 | 1.08474600  |
| H  | -1.37010100 | -0.14897200 | -0.73221200 |
| H  | 1.37057500  | 0.14890500  | -0.73306500 |
| Cl | -4.11379600 | 3.29528900  | 0.02052200  |
| Cl | 3.29554100  | 4.11352600  | -0.02140200 |
| Cl | 4.11381300  | -3.29530900 | 0.02033600  |
| Cl | -3.29553200 | -4.11352000 | -0.02144600 |

**Cartesian coordinates of the solvated DFT optimized structure of *p*-toluenesulfonic acid (TsOH) in THF**

|   |             |             |             |
|---|-------------|-------------|-------------|
| C | -2.71175200 | 0.00000200  | -0.01491500 |
| C | -1.99502100 | -1.21358300 | 0.00809400  |
| C | -0.59717200 | -1.22893300 | 0.05809300  |
| C | 0.05631800  | 0.00001200  | 0.08211600  |
| C | -0.59717600 | 1.22894900  | 0.05808200  |
| C | -1.99502900 | 1.21358700  | 0.00808400  |
| H | -2.53181500 | -2.15637900 | -0.01249900 |
| H | -0.04590200 | -2.16153600 | 0.08129600  |
| H | -0.04590800 | 2.16155300  | 0.08127600  |
| H | -2.53182600 | 2.15638100  | -0.01251700 |
| C | -4.22166100 | -0.00001200 | -0.03747800 |
| H | -4.61351900 | -0.88776400 | -0.54331300 |
| H | -4.62281300 | -0.00021900 | 0.98502900  |
| H | -4.61354500 | 0.88792300  | -0.54297100 |
| S | 1.91247200  | -0.00001000 | 0.14078600  |
| O | 2.49950100  | -1.39848900 | 0.74115100  |
| O | 2.49949500  | 1.39837400  | 0.74138100  |
| O | 2.20107400  | 0.00009200  | -1.65993000 |
| H | 3.17418600  | 0.00023600  | -1.84215400 |

**Cartesian coordinates of the solvated DFT optimized structure of tosylate (TsO<sup>-</sup>) in THF**

|   |             |             |             |
|---|-------------|-------------|-------------|
| C | -2.69346900 | 0.00223700  | 0.01069000  |
| C | -1.97195900 | -1.20857800 | 0.00066600  |
| C | -0.57244500 | -1.21562400 | -0.02082300 |
| C | 0.09836800  | 0.00554500  | -0.03773600 |
| C | -0.57342200 | 1.22375300  | -0.02103000 |
| C | -1.97538500 | 1.21257200  | 0.00113700  |
| H | -2.50797100 | -2.15345100 | 0.01046600  |
| H | -0.01795500 | -2.14698600 | -0.03550900 |
| H | -0.02088100 | 2.15625800  | -0.03475800 |
| H | -2.51359100 | 2.15590000  | 0.01158600  |
| C | -4.20623400 | -0.00522100 | 0.01432900  |
| H | -4.60076700 | -0.28292500 | -0.97224900 |
| H | -4.59955900 | -0.73014900 | 0.73624400  |
| H | -4.60905500 | 0.98044500  | 0.26712800  |
| S | 1.97633500  | 0.00020700  | -0.00058300 |
| O | 2.44518600  | -1.34834000 | -0.86105700 |
| O | 2.43240300  | -0.09602100 | 1.60551300  |
| O | 2.44937100  | 1.43554700  | -0.70157700 |

**Cartesian coordinates of the DFT optimized structure of acetic acid (AcOH) in THF**

|   |             |             |             |
|---|-------------|-------------|-------------|
| C | -0.07469800 | 0.13141800  | -0.00007000 |
| O | -0.61797500 | 1.23976300  | 0.00001000  |
| C | 1.39726400  | -0.14320700 | -0.00001000 |
| H | 1.66955000  | -0.73161100 | 0.88256100  |
| H | 1.66944800  | -0.73284900 | -0.88174500 |
| H | 1.94500000  | 0.79925600  | -0.00055300 |
| O | -0.81248000 | -1.04153700 | -0.00000400 |
| H | -1.77575100 | -0.84987200 | 0.00016800  |

**Cartesian coordinates of the DFT optimized structure of acetate (AcO<sup>-</sup>) in THF**

|   |             |             |             |
|---|-------------|-------------|-------------|
| C | 0.19443700  | 0.00071300  | -0.00002400 |
| O | 0.80637500  | -1.13131900 | -0.00000800 |
| C | -1.35903900 | -0.04379300 | 0.00003300  |
| H | -1.74257600 | 0.48128500  | 0.88575800  |
| H | -1.74272700 | 0.48243400  | -0.88493600 |
| H | -1.72137600 | -1.07753900 | -0.00057200 |
| O | 0.71791200  | 1.17785700  | -0.00003000 |

## References

- (1) Roberts, J. A. S.; Bullock, R. M. Direct Determination of Equilibrium Potentials for Hydrogen Oxidation/Production by Open Circuit Potential Measurements in Acetonitrile. *Inorg. Chem.* **2013**, *52* (7), 3823–3835.
- (2) Hansch, C.; Leo, A.; Taft, R. W. A Survey of Hammett Substituent Constants and Resonance and Field Parameters. *Chem. Rev.* **1991**, *91* (2), 165–195.
- (3) Rountree, E. S.; McCarthy, B. D.; Eisenhart, T. T.; Dempsey, J. L. Evaluation of Homogeneous Electrocatalysts by Cyclic Voltammetry. *Inorg. Chem.* **2014**, *53* (19), 9983–10002.
- (4) Elgrishi, N.; Chambers, M. B.; Fontecave, M. Turning It off! Disfavouring Hydrogen Evolution to Enhance Selectivity for CO Production during Homogeneous CO<sub>2</sub> Reduction by Cobalt–terpyridine Complexes †Electronic Supplementary Information (ESI) Available. See DOI: 10.1039/C4sc03766a Click Here for Additional Data File. *Chem. Sci.* **2015**, *6* (4), 2522–2531.
- (5) Wang, D.; Groves, J. T. Efficient Water Oxidation Catalyzed by Homogeneous Cationic Cobalt Porphyrins with Critical Roles for the Buffer Base. *Proc. Natl. Acad. Sci.* **2013**, *110* (39), 15579–15584.
- (6) Eckert, F.; Leito, I.; Kaljurand, I.; Kütt, A.; Klamt, A.; Diedenhofen, M. Prediction of Acidity in Acetonitrile Solution with COSMO-RS. *J. Comput. Chem.* **2009**, *30* (5), 799–810.
- (7) Hosseini, A.; Hodgson, M. C.; Tham, F. S.; Reed, C. A.; Boyd, P. D. W. Tapes, Sheets, and Prisms. Identification of the Weak C–F Interactions That Steer Fullerene–Porphyrin Cocrystallization. *Cryst. Growth Des.* **2006**, *6* (2), 397–403.
